# Supplementary material for: Sleep apnoea attenuates the effects of a lifestyle intervention programme in men with visceral obesity
Source: HighWire-hosted journal article supplement (doi:10.1136/thoraxjnl-2011-201001), 2012-03-06
Supplement: thoraxjnl-2011-201001-s1.pdf [file thoraxjnl-2011-201001-s1.pdf]

**Table 1-online extended version-** Characteristics of the viscerally obese men at baseline and after one year on the lifestyle intervention program

|                                               | <b>Baseline</b>  | <b>Year one</b>  | <b>One-year delta</b> | <b>p value</b> |
|-----------------------------------------------|------------------|------------------|-----------------------|----------------|
|                                               | <b>(n=77)</b>    | <b>(n=66)</b>    | <b>(n=66)</b>         |                |
| Age (years)                                   | 49.3(8.1)        | 51.0 (7.4)       | +1.1 [+1.1;+1.1]      |                |
| BMI (kg/m <sup>2</sup> )                      | 30.6 (3.1)       | 28.7 (3.3)       | -2.3 [-2.6;-1.9]      | p<0.001        |
| Waist circumference (cm)                      | 107.8 (8.8)      | 99.7 (10.1)      | -8.6 [-9.9;-7.4]      | p<0.001        |
| Systolic blood pressure (mmHg)                | 123 (11)         | 118 (9)          | -5 [-7;-3]            | p=0.001        |
| Diastolic blood pressure (mmHg)               | 82 (7)           | 76 (7)           | -6 [-7;-4]            | p<0.001        |
| Heart rate (beats/min)                        | 69 (8)           | 62 (8)           | -7 [-9;-4]            | p<0.001        |
| <b>Plasma lipids/lipoproteins</b>             |                  |                  |                       |                |
| HDL-cholesterol(mmol/L)                       | 0.95 (0.16)      | 1.07 (0.18)      | +0.14 [+0.10;+0.17]   | p<0.001        |
| Triglycerides (mmol/L)                        | 2.21 (1.90-2.86) | 1.86 (1.52-2.28) | -0.55 [-0.76;-0.35]   | p<0.001        |
| <b>Plasma glucose/insulin homeostasis</b>     |                  |                  |                       |                |
| Fasting glucose (mmol/L)                      | 6.03 (0.54)      | 5.88 (0.49)      | -0.16 [-0.26;-0.06]   | p=0.005        |
| 120 min OGTT- glucose (mmol/L)                | 7.84 (1.70)      | 6.93 (1.84)      | -1.17 [-1.62;-0.73]   | p<0.001        |
| Fasting insulin (pmol/L)                      | 168.1 (81.2)     | 109.3 (37.3)     | -61 [-78;-43]         | p<0.001        |
| AUC glucose (10 <sup>3</sup> x mmol/Lx180min) | 1.46 (0.25)      | 1.33 (0.31)      | -0.16 [-0.23;-0.09]   | p<0.001        |
| AUC ins (10 <sup>3</sup> x pmol/Lx180 min)    | 177 (80)         | 108 (501)        | -74 [-90;-59]         | p<0.001        |
| HOMA-IR                                       | 6.01 (3.92-8.31) | 3.97 (2.93-4.68) | -2.59 [-3.38;-1.79]   | p<0.001        |
| <b>Plasma adipokine/inflammatory markers</b>  |                  |                  |                       |                |
| CRP (mg/L)                                    | 1.58 (0.99-3.01) | 0.89 (0.74-1.20) | -0.53 [-1.02;-0.04]   | p<0.001        |
| TNF-alpha (pg/mL)                             | 0.99 (0.74-1.20) | 0.96 (0.71-1.27) | -0.01 [-0.07;+0.09]   | p=0.963        |
| IL-6 (pg/mL)                                  | 1.03 (0.76-1.51) | 0.95 (0.68-1.25) | -0.14 [-0.38;0.08]    | p=0.212        |
| Adiponectin (µg/mL)                           | 3.70 (1.43)      | 4.36 (1.87)      | +0.74 [+0.46;+1.01]   | P<0.001        |
| Leptin (ng/mL)                                | 11.40 (6.92)     | 8.75 (8.13)      | -3.42 [-4.33;-2.52]   | p<0.001        |
| <b>CT: L4-L5 area of adipose tissue</b>       |                  |                  |                       |                |
| SAT (cm <sup>2</sup> )                        | 299 (96)         | 241 (89)         | -58 [-68;-48]         | p<0.001        |
| VAT (cm <sup>2</sup> )                        | 260 (76)         | 191 (85)         | -76[-88;-63]          | p<0.001        |
| <b>DEXA body composition</b>                  |                  |                  |                       |                |

|                                                                     |                  |                |                     |         |
|---------------------------------------------------------------------|------------------|----------------|---------------------|---------|
| Fat free mass (kg)                                                  | 64 (7)           | 64 (6)         | -1 [-1;-0]          | p=0.002 |
| Fat mass (kg)                                                       | 29 (7)           | 23 (8)         | -6 [-7;-5]          | p<0.001 |
| <b>Submaximal treadmill exercise</b>                                |                  |                |                     |         |
| Heart rate – 3.5 mph; 2% (beats/min)                                | 116 (13)         | 104 (12)       | -13 [-15;-10]       | p<0.001 |
| Exercise output at<br>150 beats/min (METs)                          | 7.6 (1.4)        | 8.9 (1.4)      | +1.4 [1.0;1.7]      | p<0.001 |
| <b>Sleep characteristics</b>                                        | <b>n=77</b>      | <b>n=47</b>    | <b>n=47</b>         |         |
| Epworth score                                                       | 9 (5)            | 7 (4)          | -1 [-2;+0]          | p=0.042 |
| Mean SpO <sub>2</sub> (%)                                           | 94 (2)           | 95 (2)         | +1 [+0;+1]          | p<0.001 |
| Minimum SpO <sub>2</sub> (%)                                        | 84 (6)           | 82 (8)         | -1 [-2;+1]          | p=0.311 |
| Time spent under 90% SpO <sub>2</sub> (% TRT)                       | 0.4 (0.2-2.4)    | 0.5 (0.1-3.1)  | -0.9 [-2.2;0.5]     | p=0.217 |
| ODI (events/hour)                                                   | 7.5 (4.4-13.7)   | 5.8 (3.8-13.7) | -2.7 [-6.6;1.1]     | p=0.025 |
| RDI (events/hour)                                                   | 17.2 (12.0-27.3) | 8.0 (4.7-11.4) | -11.3 [-17.2;-2.3]  | p<0.001 |
| Total recording time (min)                                          | 437 (88)         | 414 (105)      | -18 [-47;10]        | p=0.128 |
| <b>Caloric intake and objective evaluation of physical activity</b> |                  |                |                     |         |
| Mean daily step count                                               | 7323 (2782)      | 9563 (3356)    | +2152 [+1467;+2837] | p<0.001 |
| Daily reported caloric intake (kcal)                                | 3004 (593)       | 2477 (488)     | -556 [-748;-363]    | p<0.001 |

Data are means (SD) for baseline and year one values or median interquartile range for not normally distributed values. Data are means [95 CI] for one-year change. P values report results of ANOVA repeated measures. Abbreviations: body mass index (BMI), visceral adipose tissue (VAT), subcutaneous abdominal adipose tissue (SAT), total recording time (TRT), oxygen desaturation index (ODI), respiratory disturbance index (RDI), CI (confidence interval).
